# Supplementary material for: Sediment Bacterial Communities Reflect the History of a Sea Basin
Source: PubMed Central journal article supplement (PMC3553170; doi:10.1371/journal.pone.0054326), 2013-01-23

**Aluminium**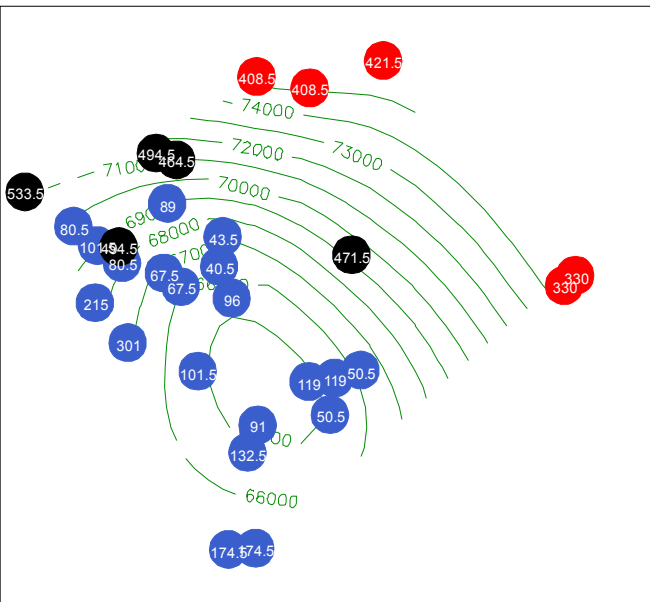**Barium**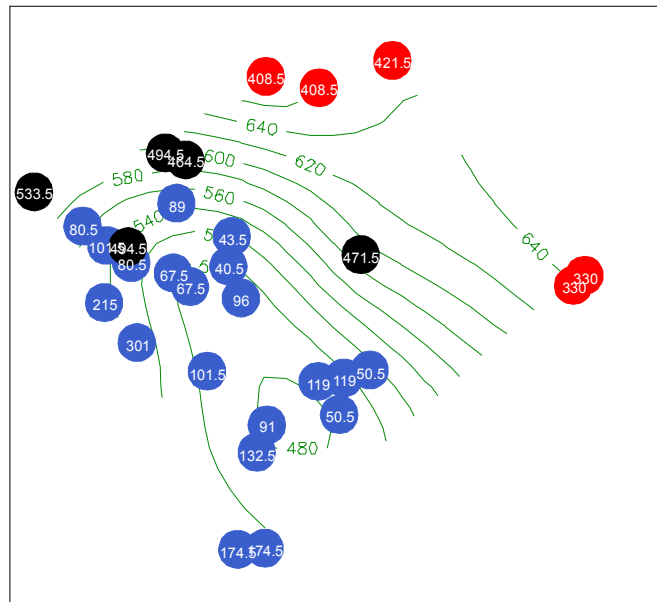**Calcium**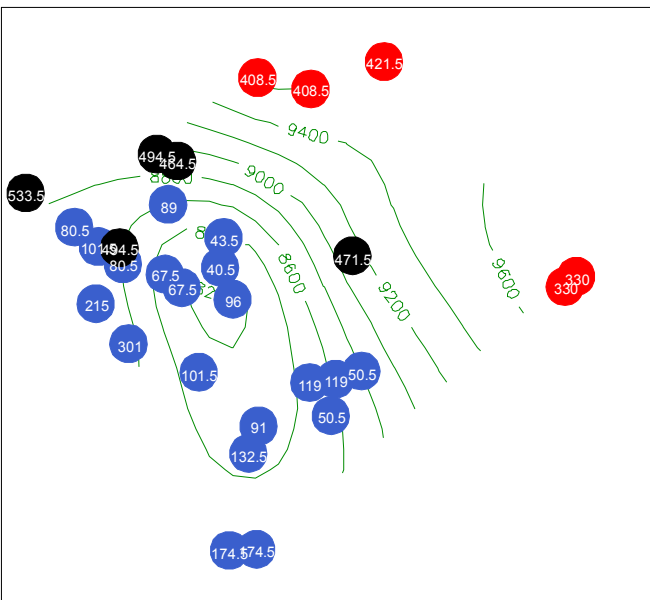**Carbon**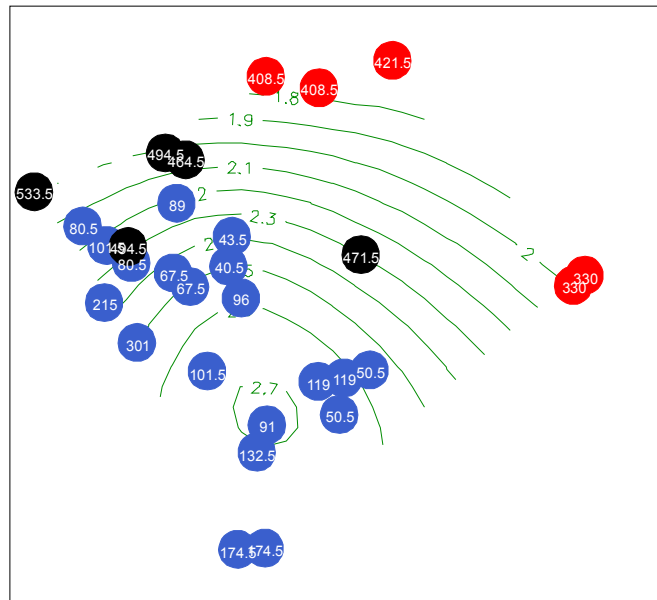**Cobalt**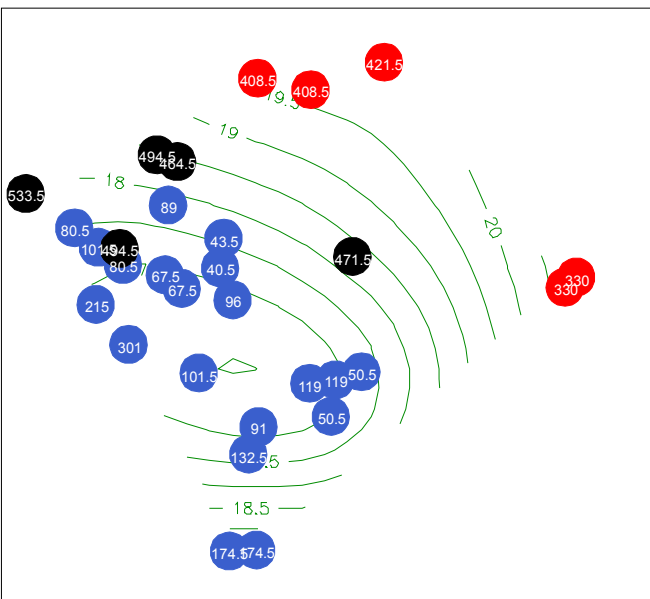**Iron**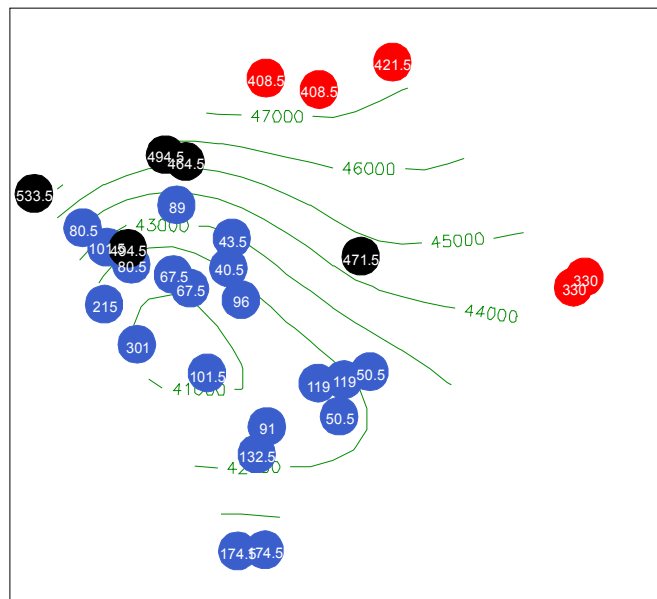

Supplement: pone.0054326.s003.pdf [file pone.0054326.s003.pdf]
