# Supplementary material for: Sediment Bacterial Communities Reflect the History of a Sea Basin
Source: PubMed Central journal article supplement (PMC3553170; doi:10.1371/journal.pone.0054326), 2013-01-23

Distance to centroid

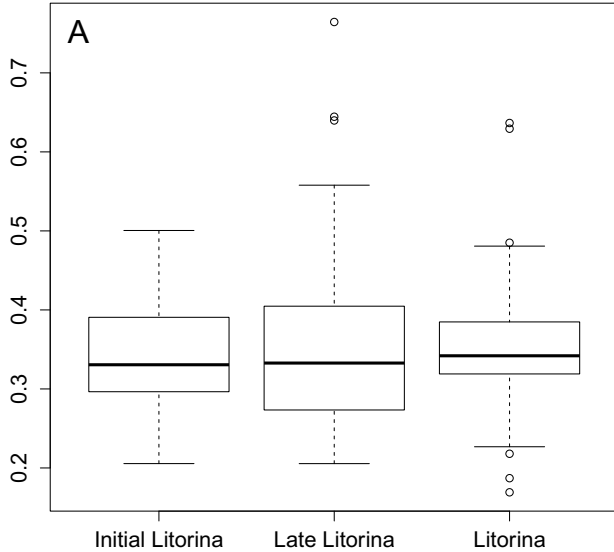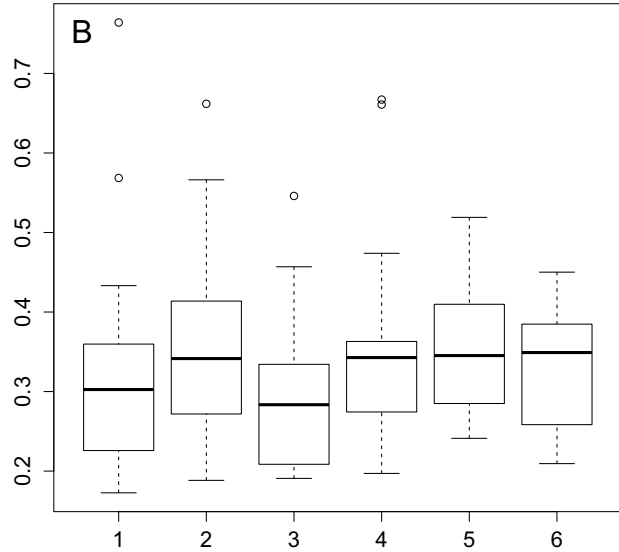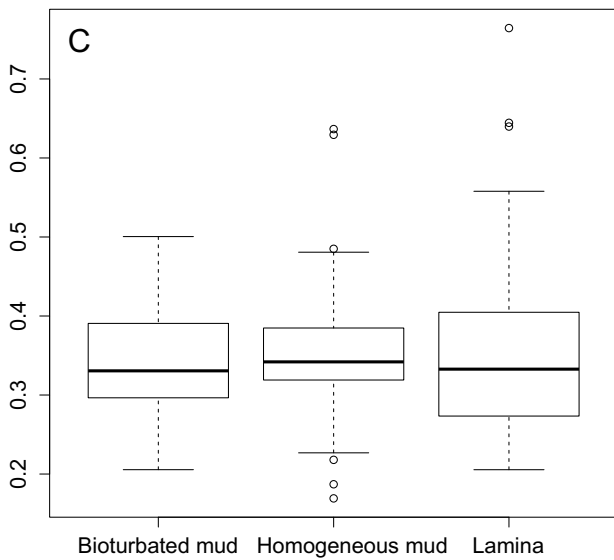

Supplement: pone.0054326.s007.pdf [file pone.0054326.s007.pdf]
